# Supplementary material for: Exploiting collider bias to apply two-sample summary data Mendelian randomization methods to one-sample individual level data
Source: PubMed Central journal article supplement (PMC8376220; doi:10.1371/journal.pgen.1009703), 2021-08-09
Supplement: pgen.1009703.s001.pdf [file pgen.1009703.s001.pdf]

Supporting information 1A and 1B for  
‘Exploiting collider bias to apply two-sample  
summary data Mendelian randomization methods  
to one-sample individual level data’

July 14, 2021

## A: Derivation of the Collider-Correction formula

The asymptotic least squares estimates of the effects of  $X$  and  $G$  on  $Y$ , without conditioning on  $U$ , are

$$\begin{bmatrix} \beta^* \\ \alpha_1^* \\ \vdots \\ \alpha_k^* \end{bmatrix} = \begin{bmatrix} \text{var}(X) & \text{cov}(X, G_1) & \cdots & \text{cov}(X, G_k) \\ \text{cov}(X, G_1) & \text{var}(G_1) & \cdots & \text{cov}(G_1, G_k) \\ \vdots & \vdots & \ddots & \vdots \\ \text{cov}(X, G_k) & \text{cov}(G_1, G_k) & \cdots & \text{var}(G_k) \end{bmatrix}^{-1} \begin{bmatrix} \text{cov}(X, Y) \\ \text{cov}(G_1, Y) \\ \vdots \\ \text{cov}(G_k, Y) \end{bmatrix}$$

Assuming no LD between SNPs, so  $\text{cov}(G_i, G_j) = 0$  where  $i \neq j$ , the variance-covariance matrix has block form with a diagonal matrix in the lower right quadrant. Block-wise inversion gives

$$\begin{bmatrix} \text{var}(X) & \text{cov}(X, G_1) & \cdots & \text{cov}(X, G_k) \\ \text{cov}(X, G_1) & \text{var}(G_1) & \cdots & \text{cov}(G_1, G_k) \\ \vdots & \vdots & \ddots & \vdots \\ \text{cov}(X, G_k) & \text{cov}(G_1, G_k) & \cdots & \text{var}(G_k) \end{bmatrix}^{-1} = \frac{1}{\text{var}(X) - \sum_j \frac{\text{cov}(X, G_j)^2}{\text{var}(G_j)}} \begin{bmatrix} 1 & \frac{-\text{cov}(X, G_1)}{\text{var}(G_1)} & \cdots & \frac{-\text{cov}(X, G_k)}{\text{var}(G_k)} \\ \frac{-\text{cov}(X, G_1)}{\text{var}(G_1)} & \frac{\text{cov}(X, G_1)^2}{\text{var}(G_1)^2} & \cdots & \frac{\text{cov}(X, G_1)\text{cov}(X, G_k)}{\text{var}(G_1)\text{var}(G_k)} \\ \vdots & \vdots & \ddots & \vdots \\ \frac{-\text{cov}(X, G_k)}{\text{var}(G_k)} & \frac{\text{cov}(X, G_1)\text{cov}(X, G_k)}{\text{var}(G_1)\text{var}(G_k)} & \cdots & \frac{\text{cov}(X, G_k)^2}{\text{var}(G_k)^2} \end{bmatrix} +$$

$$\begin{bmatrix} 0 & 0 & \cdots & 0 \\ 0 & \frac{1}{\text{var}(G_1)} & \cdots & 0 \\ \vdots & \vdots & \ddots & \vdots \\ 0 & 0 & \cdots & \frac{1}{\text{var}(G_k)} \end{bmatrix}$$

Then

$$\beta^* = \frac{\text{cov}(X, Y) - \sum_j \frac{\text{cov}(X, G_j)\text{cov}(G_j, Y)}{\text{var}(G_j)}}{\text{var}(X) - \sum_j \frac{\text{cov}(X, G_j)^2}{\text{var}(G_j)}}$$

And

$$\begin{aligned} \alpha_i^* &= \frac{\frac{-\text{cov}(X, G_j)}{\text{var}(G_j)} \left( \text{cov}(X, Y) - \sum_j \frac{\text{cov}(X, G_j)\text{cov}(G_j, Y)}{\text{var}(G_j)} \right)}{\text{var}(X) - \sum_j \frac{\text{cov}(X, G_j)^2}{\text{var}(G_j)}} + \frac{\text{cov}(G_i, Y)}{\text{var}(G_i)} \\ &= -\beta_{XG_j}\beta^* + \frac{\text{cov}(G_i, Y)}{\text{var}(G_i)} \end{aligned}$$

From equation 2,  $\text{cov}(G_i, Y) = (\alpha_i + \beta\beta_{XG_i}) \text{var}(G_i)$ . Therefore

$$\alpha_j^* = \alpha_j + \beta_{XG_j}(\beta - \beta^*)$$

The causal effect  $\beta$  is therefore the observational effect  $\beta^*$ , plus the slope of the regression of  $\alpha_j^*$  on  $\beta_{XG_j}$ .

## B: Outlier SNPs sets for the Insomnia-HBA1c analysis.

SNP set detected as outliers using a Bonferroni corrected exact  $Q$  statistic in analysis (a) (23andMe + UK Biobank data)

|    |            |
|----|------------|
| 1  | rs10758593 |
| 2  | rs1264419  |
| 3  | rs12917449 |
| 4  | rs12924275 |
| 5  | rs1861412  |
| 6  | rs214934   |
| 7  | rs2737240  |
| 8  | rs2792990  |
| 9  | rs3131638  |
| 10 | rs34490907 |
| 11 | rs429358   |
| 12 | rs4788203  |
| 13 | rs6888135  |

SNP set detected as outliers using a Bonferroni corrected exact  $Q$  statistic  
in analysis (b) (23andMe data only)

|   |            |
|---|------------|
| 1 | rs10758593 |
| 2 | rs1264419  |
| 3 | rs214934   |
| 4 | rs2792990  |
| 5 | rs4788203  |
| 6 | rs647905   |
